# Supplementary material for: Erlangen Score as a tool to predict progression from mild cognitive impairment to dementia in Alzheimer’s disease
Source: PubMed Central journal article supplement (PMC6320577; doi:10.1186/s13195-018-0456-x), 2019-01-05

Table S1. The distributions of the Erlangen Score neurochemical categories (0 - 4)

across the four diagnostic groups. Presented are the numbers in a given diagnostic group.

| Diagnosis | Erlangen Score |   |    |    |     | Total |
|-----------|----------------|---|----|----|-----|-------|
|           | 0              | 1 | 2  | 3  | 4   |       |
| AD        | 7              | 2 | 26 | 9  | 124 | 168   |
| CTR       | 34             | 3 | 27 | 1  | 1   | 66    |
| MCI-AD    | 3              | 0 | 13 | 3  | 51  | 70    |
| MCI-St    | 26             | 3 | 20 | 5  | 20  | 74    |
| Total     | 70             | 8 | 86 | 18 | 196 | 378   |

Table S2. Hazard ratios in the Cox Proportional Hazard model, i. e. under assumption of time-independent hazard ratios.

|                 | HR   | Std. Err. | z     | P> z  | [95% Conf. Interval] |        |
|-----------------|------|-----------|-------|-------|----------------------|--------|
| Erlangen Score: |      |           |       |       |                      |        |
| Possible        | 2.92 | 1.89      | 1.66  | 0.097 | 0.822                | 10.369 |
| Probable        | 6.73 | 4.25      | 3.02  | 0.003 | 1.953                | 23.214 |
| Age             | 1.00 | 0.02      | 0.18  | 0.860 | 0.969                | 1.038  |
| Female gender   | 1.01 | 0.26      | 0.04  | 0.965 | 0.607                | 1.684  |
| APOE e4 posit.  | 1.49 | 0.39      | 1.53  | 0.126 | 0.894                | 2.484  |
| MMSE            | 0.94 | 0.04      | -1.68 | 0.092 | 0.865                | 1.011  |

Table S3. Erlangen Score summarized in a form of a set of the if/then commands, easily implementable into laboratory software, based on the cut-off values established in the Laboratory in Coimbra, and presented in Materials and Methods, and "border zones" arbitrary defined as a pathologic result within 10% of the reference value.

| Command line                                                              | Comment/Interpretation                                                                                                                                                                                                                                                          |
|---------------------------------------------------------------------------|---------------------------------------------------------------------------------------------------------------------------------------------------------------------------------------------------------------------------------------------------------------------------------|
| If $A\beta_{1-42} < 580$ Or $A\beta_{42/40} < 0.068$ Then $ES = ES + 1$   | $A\beta_{1-42}$ or $A\beta_{42/40}$ in border zone (i. e. slightly decreased, but not lower than reference value minus 10%).                                                                                                                                                    |
| If $A\beta_{1-42} < 522$ Or $A\beta_{42/40} < 0.062$ Then $ES = ES + 1$   | $A\beta_{1-42}$ or $A\beta_{42/40}$ decreased below the border zone (i. e. lower than the reference value minus 10%).                                                                                                                                                           |
| If $\text{Tau} > 250$ Or $p\text{Tau}_{181} > 37$ Then $ES = ES + 1$      | Tau or $p\text{Tau}_{181}$ in border zone (i. e. slightly increased, but not higher than the reference value plus 10%).                                                                                                                                                         |
| If $\text{Tau} > 275$ Or $p\text{Tau}_{181} > 41$ Then $ES = ES + 1$      | Tau or $p\text{Tau}_{181}$ increased beyond the border zone (i. e. higher than 10% above the reference value).                                                                                                                                                                  |
| If $\text{Tau} > 1200$ And $p\text{Tau}_{181} \leq 41$ Then $ES = ES - 1$ | A case with a very high Tau, not accompanied by a corresponding increase in $p\text{Tau}_{181}$ , decreases probability of AD-pathology in favor of the probability of underlying rapidly progressing neurodegeneration. Such cases were not observed in this particular study. |

Figure S1. Nelson-Aalen cumulative hazard estimation. Note overlapping cumulative hazards in the "neurochemically possible" and "neurochemically probable" groups until ca. 3 year follow-up, which then clearly splits resulting in the cumulative hazard of the "possible" group still increasing, but at the rate comparable (parallel) to this in the "neurochemically improbable" (i. e. the reference) group.

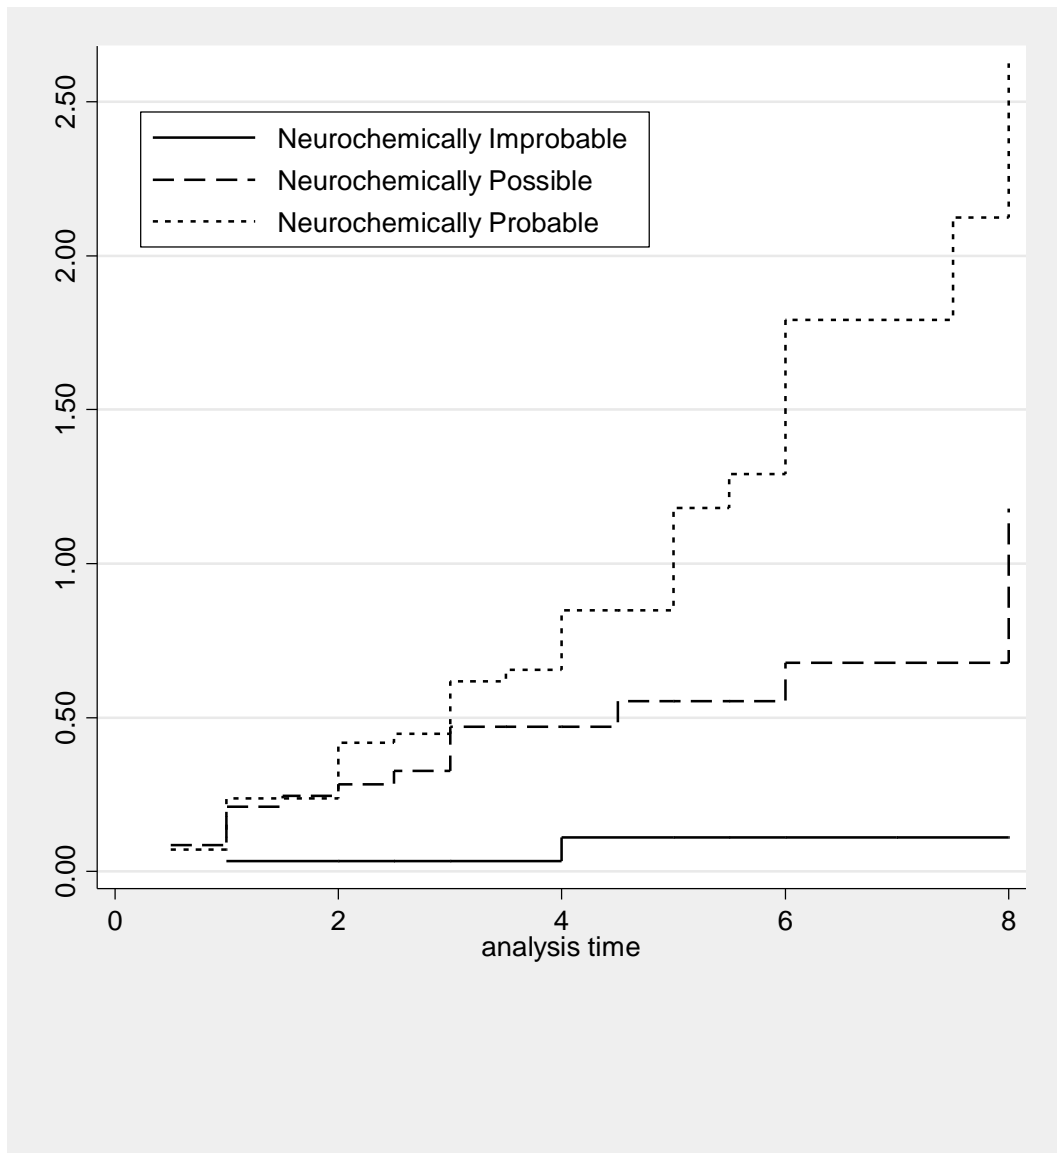

Supplement: 13195_2018_456_MOESM1_ESM.pdf [file 13195_2018_456_MOESM1_ESM.pdf]
